# Supplementary material
Source: PubMed Central journal article supplement (PMC152862)
Supplement: nar_31_6_1605__1.pdf [file nar_31_6_1605__1.pdf]

SUPPLEMENTARY MATERIAL

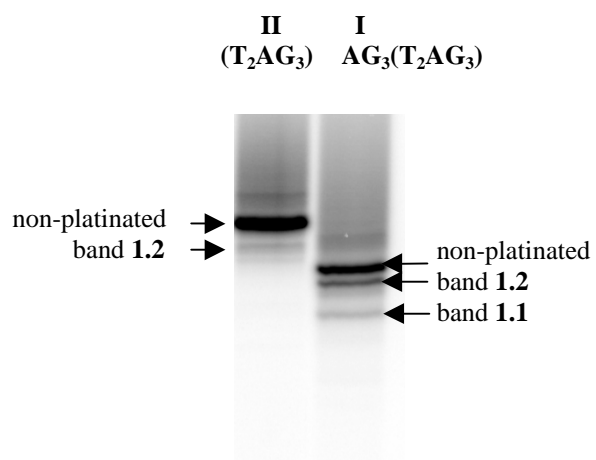

**Figure S1.** Denaturing gel electrophoresis (20% acrylamide) of the platination products of  $AG_3(T_2AG_3)_3$  **I** and  $(T_2AG_3)_4$  **II** by *cis*- $[Pt(NH_3)_2(H_2O)_2]^{2+}$  **1** in 50mM  $K^+$ . The numbering of the bands e.g. 1.1 indicates the complex (here **1**) and the migration order on the gel.

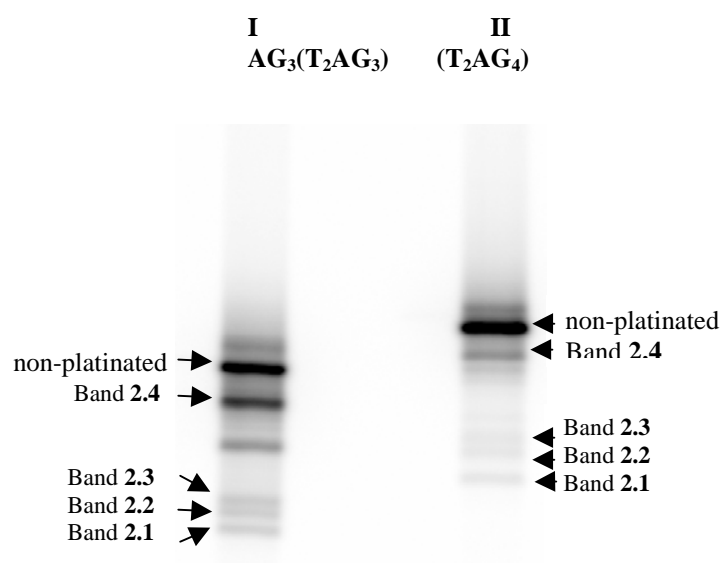

**Figure S2.** Denaturing gel electrophoresis (20% acrylamide) of the platination products of  $\text{AG}_3(\text{T}_2\text{AG}_3)_3$  **I** and  $(\text{T}_2\text{AG}_3)_4$  **II** by *trans*- $[\text{Pt}(\text{NH}_3)_2(\text{H}_2\text{O})_2]^{2+}$  **2** in 50mM  $\text{Na}^+$  solution. Same numbering of the bands as in Figure 1S e.g. **2.1**. The products contained in the bands marked by an asterisk were found unstable in the digestion conditions and could not be analyzed further.
